# Supplementary material
Source: MDPI journal article supplement (https://www.mdpi.com/2311-5629/8/2/30)
Supplement: s1 [file s1]

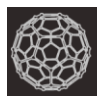

# Supplementary Materials: Plasma-Enhanced Carbon Nanotube Fiber Cathode for Li-S Batteries

Yanbo Fang <sup>1</sup>, Yu-Yun Hsieh <sup>1</sup>, Mahnoosh Khosravifar <sup>1</sup>, Paa Kwasi Adusei <sup>1</sup>, Sathya Narayan Kanakaraj <sup>1</sup>, Bely Stockman <sup>2</sup>, Vamsi Krishna Reddy Kondapalli <sup>1</sup> and Vesselin Shanov <sup>1,2,\*</sup>

<sup>1</sup> Department of Mechanical and Materials Engineering, University of Cincinnati, Cincinnati, OH 45221-0072, USA; fangyb@mail.uc.edu (Y.F.); hsiehyu@mail.uc.edu (Y.-Y.H.); khosramh@mail.uc.edu (M.K.); aduseipi@mail.uc.edu (P.K.A.); kanakasa@mail.uc.edu (S.N.K.); kondapvy@mail.uc.edu (V.K.R.K.)

<sup>2</sup> Department of Chemical and Environmental Engineering, University of Cincinnati, Cincinnati, OH 45221-0012, USA; stockmby@mail.uc.edu

\* Correspondence: shanovvn@ucmail.uc.edu

**Abstract:** Fiber-shaped batteries have attracted much interest in the last few years. However, a major challenge for this type of battery is their relatively low energy density. Here, we present a freestanding, flexible CNT fiber with high electrical conductivity and applied oxygen plasma-functionalization, which was successfully employed to serve as an effective cathode for Li-S batteries. The electrochemical results obtained from the conducted battery tests showed a decent rate capability and cyclic stability. The cathode delivered a capacity of 1019 mAh g<sup>-1</sup> at 0.1 C. It accommodated a high sulfur loading of 73% and maintained 47% of the initial capacity after 300 cycles. The demonstrated performance of the fiber cathode provides new insights for the designing and fabrication of high energy density fiber-shaped batteries.

**Keywords:** lithium-sulfur batteries; fiber battery; CNT; oxygen plasma functionalization; polysulfide

## 1. EDS analysis of OCNT-S and CNT-S.

a1

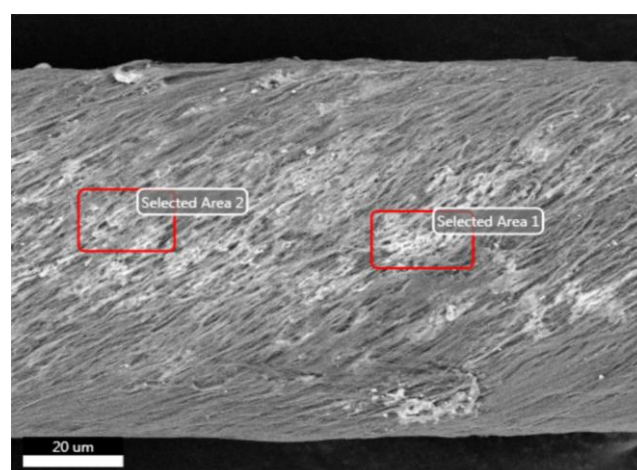

a2

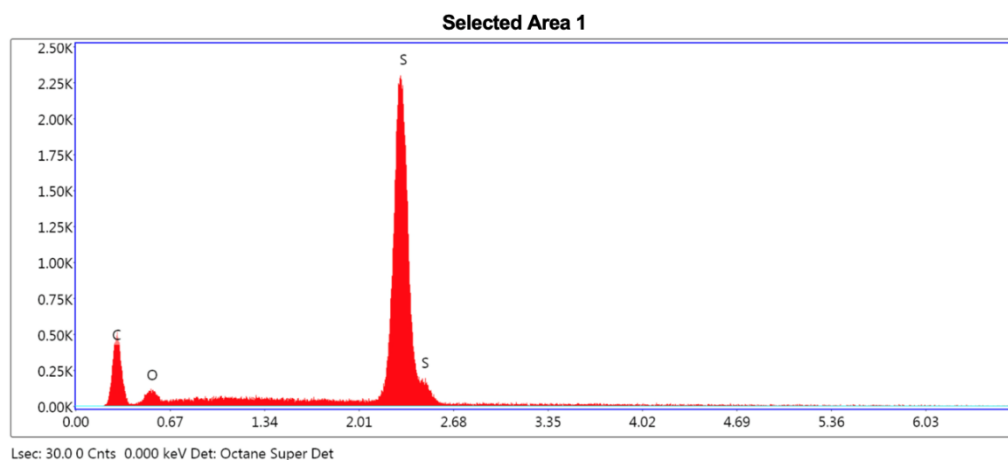**eZAF Smart Quant Results**

| Element | Weight % | Atomic % | Net Int. | Error % | Kratio | Z    | R    | A    | F |
|---------|----------|----------|----------|---------|--------|------|------|------|---|
| C K     | 45.70    | 68.67    | 240.66   | 11.84   | 0.07   | 1.1  | 0.96 | 0.14 | 1 |
| O K     | 1.35     | 1.52     | 21.28    | 29.68   | 0.00   | 1.04 | 0.98 | 0.29 | 1 |
| S K     | 52.95    | 29.81    | 1,748.52 | 2.78    | 0.48   | 0.9  | 1.03 | 1    | 1 |

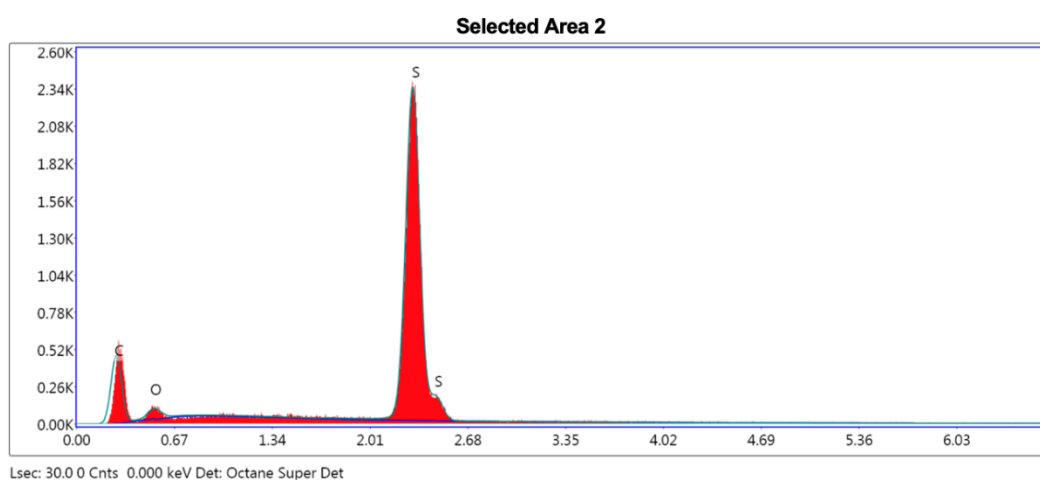**eZAF Smart Quant Results**

| Element | Weight % | Atomic % | Net Int. | Error % | Kratio | Z    | R    | A    | F |
|---------|----------|----------|----------|---------|--------|------|------|------|---|
| C K     | 47.21    | 69.90    | 271.56   | 11.71   | 0.08   | 1.1  | 0.96 | 0.15 | 1 |
| O K     | 1.48     | 1.65     | 24.75    | 26.22   | 0.00   | 1.04 | 0.98 | 0.29 | 1 |
| S K     | 51.30    | 28.45    | 1,795.00 | 2.78    | 0.46   | 0.9  | 1.03 | 1    | 1 |

b1

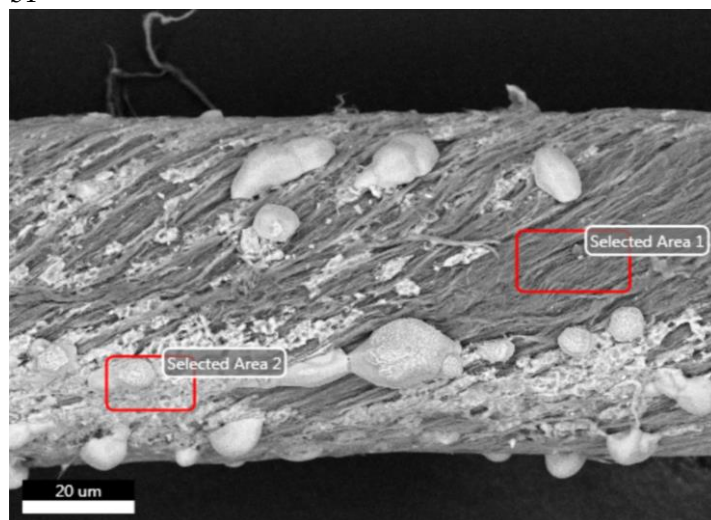

b2

### Selected Area 1

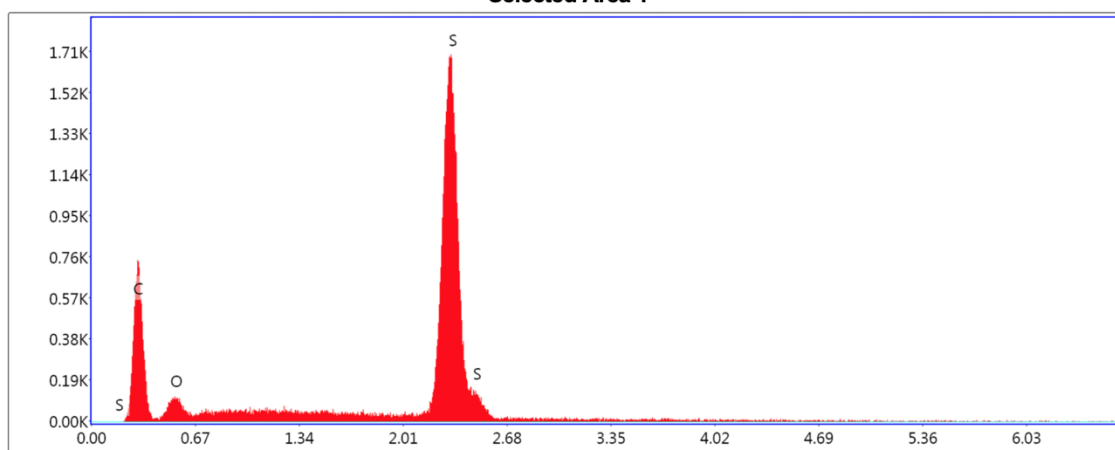

Lsec: 30.0 0 Cnts 0.000 keV Det: Octane Super Det

### eZAF Smart Quant Results

| Element | Weight % | Atomic % | Net Int. | Error % | Kratio | Z    | R    | A    | F |
|---------|----------|----------|----------|---------|--------|------|------|------|---|
| C K     | 56.15    | 76.44    | 346.09   | 11.15   | 0.11   | 1.08 | 0.96 | 0.18 | 1 |
| O K     | 2.33     | 2.38     | 33.67    | 20.24   | 0.01   | 1.02 | 0.98 | 0.29 | 1 |
| S K     | 41.52    | 21.18    | 1,265.01 | 2.90    | 0.37   | 0.88 | 1.03 | 1.01 | 1 |

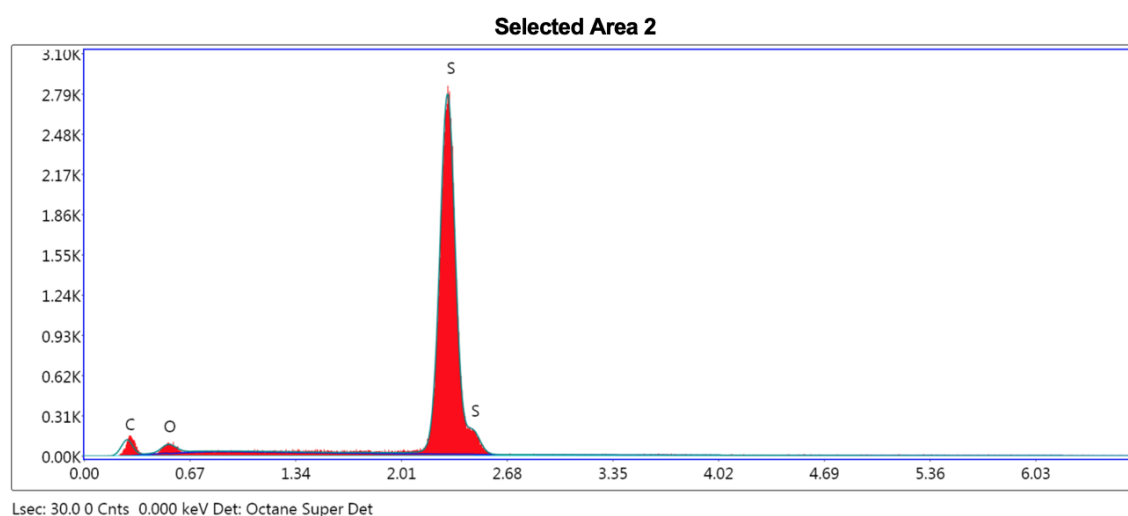

### eZAF Smart Quant Results

| Element | Weight % | Atomic % | Net Int. | Error % | Kratio | Z    | R    | A   | F |
|---------|----------|----------|----------|---------|--------|------|------|-----|---|
| C K     | 22.09    | 42.69    | 67.63    | 14.14   | 0.02   | 1.16 | 0.93 | 0.1 | 1 |
| O K     | 1.25     | 1.82     | 17.26    | 31.61   | 0.00   | 1.1  | 0.96 | 0.3 | 1 |
| S K     | 76.65    | 55.49    | 2,138.46 | 2.70    | 0.73   | 0.95 | 1.01 | 1   | 1 |

**Figure S1.** (a1) Selected areas on the OCNT-S for analysis; (a2) EDS spectrum and element analysis data at different areas of OCNT-S; (b1) Selected areas on the CNT-S for analysis; (b2) EDS spectrum and element analysis data at different areas of CNT-S.

## 2. EDS mapping for sulfur elemental distribution

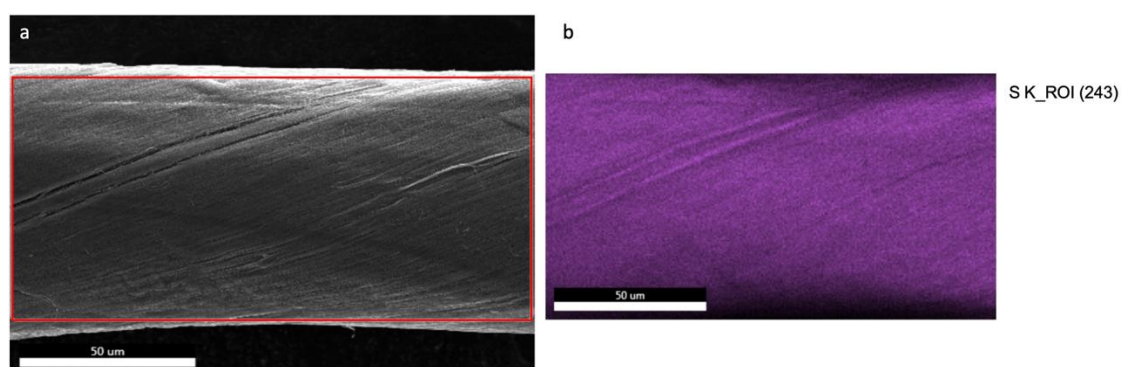

**Figure S2.** (a) SEM image of OCNT-S, showing the selected area for EDS mapping. (b) Sulfur elemental distribution of OCNT-S.
